# Supplementary material for: Fossil Leaves of Meliosma (Sabiaceae) With Associated Pollen and a Eupodid Mite From the Eocene of Maoming Basin, South China
Source: Frontiers journal article supplement (doi:10.3389/fevo.2021.770687), 2022-01-03
Supplement: Table_1.xls [file Table_1.xls]

## Sheet: Лист1
Supplementary Table 1 Fossil record of Meliosma
Name	Organ	Age	Formation, Site	References
Meliosma sp. cf. M.tenius Maxim.	leaf	Pliocene	Kabutoiwa Fm, Central Honshu, Japan	Ozaki, 1991
Meliosma sp. cf. M.myriantha Siebold et Zucc.	leaf	Pliocene	Kabutoiwa Fm, Central Honshu, Japan	Ozaki, 1991
Meliosma cf. rigida Siebold et Zucc.	fruits	lower Pliocene	Hatagoya, Central Honshu, Japan	Miki, 1941; Van Beusekom, 1971, p. 402, Fig. 13-E 1, 2
M. europaea C.et E.M. Reid (=syn.M. wetteraviensis)	fruits	Pliocene	Reuver, Swalmen, Netherlands; Pont de Gail, Cantal, France; Klarbecken bei Niederrad, Frankfurt am Main, W. Germany; Poland	Van Beusekom, 1971
Meliosma canavesana Martinetto	fruit	Pliocene	NW and Central Italy	Martinetto, 2001a, 2001b
Meliosma aff. reticulata (C. et E.M. Reid) Chandler (=M. canavesana)	fruit	Pliocene	Northern Italy	Martinetto, 1998
Meliosma wetteraviensis (Ludwig) Mai	fruit	Pliocene	Wetterau, Dorheim, West. Germany; Central Italy	Mai, 1964, 1973; Van Beusekom, 1971; Martinetto, 1994, 2001a, 2001b
Meliosma pliocaenica(Szafer) Gregor	fruit	Miocene to Pliocene	Noviiskar Fm, Sandanski Fm, Bulgaria	Mai and Palamarev, 1997
Meliosma miessleri Mai	fruit	Miocene; Pliocene	Hartau near Zittau, Oberlausitz, Eastern Germany; Hrádek Fm, Kristina Mine, Czech Republic; Sento, Lanzo, NW and Central Italy	Mai, 1964; Van Beusekom, 1971; Martinetto, 1998; Holý et al., 2012
Meliosma lincangensis Tao et Chen	leaf	Miocene to Pliocene	Lincang Region,Yunnan, southwestern China	Tao and Chen, 1983; Tao et al., 2000
Meliosma buchananifolia Merr.	leaf	Miocene to Pliocene	Tengchong County, Yunnan, southwestern China	Tao and Du, 1982; Tao et al., 2000; Li et al., 2004
Meliosma sp.	leaf	late Miocene	Tatsumitoge flora, Tottori Prefecture, Southwest Honshu, Japan	Ozaki, 1980
Meliosma predentata MacGinitie	leaf	late Miocene	Kilgore flora, Nebraska, USA	MacGinitie, 1962; Van Beusekom, 1971, p. 402, Fig 10-D
Meliosmacf. flexuosa Pamp.	leaf	Miocene	Xiananshan Formation, Zhejiang, eastern China	Jia and Sun, 2011
Meliosma shanwangensis Hu et Chaney	leaf	early-middle Miocene	Shandong, eastern China; Kobe, Japan; South Primorye, Russia	Hu and Chaney, 1940; WGCPC, 1978; Hori, 1983; Pavlyutkin et al., 2012.
Meliosma obtusifolia Tao	leaf	early-middle Miocene	Shandong, eastern China	WGCPC, 1978
Meliosma mio-oldhami Suzuki et Watari	wood	early Miocene	Nawamata Fm, Monzen, Noto Peninsula, Japan	Suzuki and Watari, 1994
Meliosma europaea C.et E.M. Reid (=syn. M. wetteraviensis)	fruit	Oligocene - Miocene	Ekaterininskoye near Tara, Omsk region; Krasnyi Yar, Irtysh River; Kireyevskoye, Ob' River (West Siberia), Russia	Dorofeev, 1963; Van Beusekom, 1971
Meliosma reticulata (C. et E.M. Reid) Chandler	fruit	Oligocene	Bovey Tracey and Heathfield, Devonshire, England; Haselbach, Saxony, Germany	Chandler, 1957; Mai and Walter, 1978
Meliosma sp.	leaf	Oligocene - Miocene	Liuqu Formation, Lazi County, Xizang, Tibet	Tao, 1988
Meliosma nevolinae Pavlyutkin	leaf	early Oligocene	Fatashinskaya Fm, Kraskino, South Primorye, Russia	Pavlyutkin et al., 2014
Meliosma sp.	leaf	early Oligocene	Fatashinskaya Fm, Kraskino, South Primorye, Russia	Pavlyutkin et al., 2014
Meliosma aesculifolia Chaney et Sanborn	leaf	early Oligocene	Goshen, Lane County, Oregon (USA)	Chaney and Sanborn, 1933 (depicted in Van Beusekom 1971, p. 391, Fig, 14-B)
Meliosma rostrata Chaney et Sanborn	leaf	early Oligocene	Goshen, Lane County, Oregon (USA)	Chaney and Sanborn, 1933 (depicted in Van Beusekom 1971, p. 403, Fig, 14-C 1, 2)
Meliosma goshenensis Chaney et Sanborn	leaf	early Oligocene	Goshen, Lane County, Oregon (USA)	Chaney and Sanborn, 1933 (depicted in Van Beusekom 1971, p. 399, Fig, 10-A)
Meliosma sp.	leaf	late (?) Eocene	Nadu Fm, Fengling Town, Nanning City, Guangxi, southern China	Feng et al., 1977
Meliosma sp.	pollen	Eocene	Huangniuling Fm, Maoming Basin, Guangdong, South China	This paper
Meliosma eosinica sp. nov.	leaf	Eocene	Huangniuling Fm, Maoming Basin, Guangdong, South China	This paper
Meliosma rigidofolia Guo	leaf	Eocene	Fushun coalmine, Liaoning, northeastern China	WGCPC, 1978
Meliosma augustaHe et Tao nom. nud.	leaf?	Eocene	Yilan Coal Mine, Heilongjiang, northernmost China	He and Tao, 1997
Meliosma sp.	leaf	Eocene	Shinao Basin, Panxian County, Guizhou, southwest China	Zhang, 1983; Wu et al., 2011
Meliosma truncata MacGinitie	leaf	Eocene	Chalk Bluffs, Sierra Nevada, California, USA	MacGinitie, 1941
Meliosma cf. jenkinsii Reid et Chandler	fruit	middle Eocene	Clarno Fm, Nut Beds, Oregon, USA	Manchester, 1994
Meliosma leptocarpa Manchester	fruit	middle Eocene	Clarno Fm, Nut Beds, Oregon, USA	Manchester, 1994
Meliosma elongicarpa Manchester	fruit	middle Eocene	Clarno Fm, Nut Beds, Oregon, USA	Manchester, 1994
Meliosma bonesii Manchester	fruit	middle Eocene	Clarno Fm, Nut Beds, Oregon, USA	Manchester, 1994
Meliosma beusekomii Manchester	fruit	middle - late Eocene	Clarno Fm, Nut Beds; John Day Fm, Oregon, USA;	Manchester, 1994; Manchester and McIntosh, 2007
Meliosma sp. cf. simplicifolia	leaf	middle Eocene	Clarno Fm, Nut Beds, Oregon, USA	Manchester, 1981
Meliosma brehmii Wheeler et Manchester	wood	middle Eocene	Clarno Fm, Nut Beds, Oregon, USA	Wheeler and Manchester, 2002
Meliosma deweyii Wheeler et Manchester	wood	middle Eocene	Clarno Fm, Nut Beds, Oregon, USA	Wheeler and Manchester, 2002
Meliosma dodsonii Wheeler et Manchester	wood	middle Eocene	Clarno Fm, Nut Beds, Oregon, USA	Wheeler and Manchester, 2002
Meliosma kushtakensis Wolfe	leaf	middle-late Eocene	Kushtaka Fm, Gulf of Alaska Region, USA	Wolfe, 1977
Meliosma duktothensis Wolfe	leaf	middle-late Eocene	Kulthieth Fm, Gulf of Alaska Region, USA	Wolfe, 1977
Meliosma sp.	fruit	middle Eocene	Messel Fm, Germany	Collinson et al., 2012
Meliosma jenkinsii Reid et Chandler	fruit	Eocene	London Clay Fm, southern England Geiseltal, Germany	Reid and Chandler, 1933; Chandler, 1961; Mai, 1976
Meliosma cantiensis Reid et Chandler	fruit	early-middle Eocene	London Clay Fm, southern England	Reid and Chandler, 1933; Chandler, 1961; Collinson, 1983
Meliosma longifolia (Heer) Hickey	leaf	early Eocene	Golden Valley Fm; North Dakota, USA	Hickey, 1977
Meliosma sheppeyensis Reid et Chandler	fruit	early Eocene, late Paleocene	London Clay Fm, southern England; Gonna, Germany	Reid and Chandler, 1933; Chandler, 1961; Mai, 1987
Meliosma gonnensis Mai	fruit	late Paleocene	Gonna, Germany	Mai, 1987
Meliosma vandaelium Peppe et Hickey	leaf	middle Paleocene	Fort Union Fm (Tongue River Member) Williston Basin, North Dakota, USA	Peppe and Hickey, 2014
Meliosma thriviensis Peppe et Hickey	leaf	early Paleocene	Fort Union Fm (Ludlow Member) Williston Basin, North Dakota, USA	Peppe and Hickey, 2014
Meliosma rostellata (Lesquereux) Crane, Manchester et Dilcher	fruit	Paleocene - latest Cretaceous (?)	Denver Fm, Golden, Colorado; Fort Union Fm (Sentinel Butte Member), Almont, North Dakota, USA	Crane et al., 1990
Meliosma praealba Knobloch et Mai	fruit	Late Cretaceous, Maastrichtian	Walbeck, Germany	Knobloch and Mai, 1986
